# Supplementary material for: Controlled synthesis of a PS/Au/ZIF-8 hybrid structure as a SERS substrate for ultrasensitive detection
Source: Royal Society of Chemistry journal article supplement (doi:10.1039/d0nj05400c), 2020-12-17
Supplement: d0nj05400c1.pdf [file d0nj05400c1.pdf]

## Electronic Supporting Information

### Controlled Synthesized of PS/Au/ZIF-8 Hybrid Structure as SERS

#### Substrate for Ultrasensitive Detection

Xiangxin Xue, Lei Chen, Chunxu Wang, Yu Qiao, Cuimei Zhao, Hairui Wang, Ping  
Nie, Jiahui Li, Jin Fu, Zhao, Limin Chang

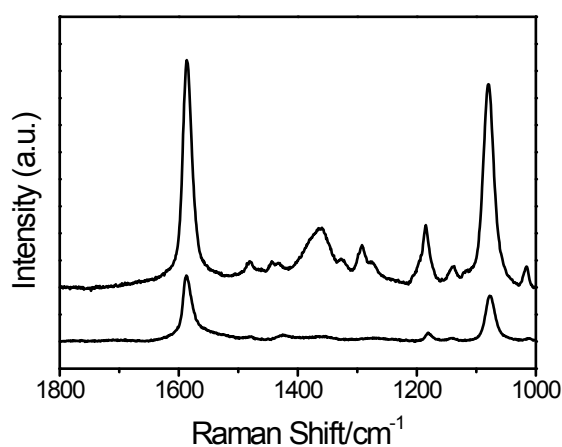

**Figure S1.** SERS spectra of 4-MBA ( $10^{-3}$  mol/L) adsorbed on the PS/Au (10 min)/ZIF-8 and PS/Au (10 min) substrates under 633 nm laser line.
